# Supplementary material for: Enhancing the cycling stability of a hollow architecture Li-rich cathode via Ce-integrated surface/interface/doping engineering
Source: Royal Society of Chemistry journal article supplement (doi:10.1039/d2qi02126a), 2022-12-02
Supplement: d2qi02126a1.pdf [file d2qi02126a1.pdf]

## Supporting Information

### Enhancing cyclic stability of hollow architecture Li-rich cathode via Ce integrated surface/interface/doping engineering

#### 1. Experimental Section

##### 1.1 Materials preparation.

The  $\text{Mn}_{0.75}\text{Ni}_{0.25}\text{CO}_3$  precursor was synthesized via using a carbonate coprecipitation method. The mixed solution ( $2 \text{ mol L}^{-1}$ ) containing a molar ratio of  $\text{Mn}:\text{Ni}=3:1$  of  $\text{MnSO}_4\cdot\text{H}_2\text{O}$  and  $\text{NiSO}_4\cdot 6\text{H}_2\text{O}$  was pumped into a continuously stirred tank reactor (3 L) under inertial  $\text{N}_2$  atmosphere. Then,  $2 \text{ mol L}^{-1}$  of  $\text{Na}_2\text{CO}_3$  solution and  $0.1 \text{ mol L}^{-1}$  of  $\text{NH}_3\cdot\text{H}_2\text{O}$  were added in sequence into the tank reactor. The temperature ( $55 \text{ }^\circ\text{C}$ ), pH value (7.8), and stirring speed (1000 rpm) of the solution were carefully controlled and maintained constant. The precursor powders were obtained through washing, filtering, and drying in a vacuum oven for 6h to remove adsorbed water.

LLO samples were prepared by mixing  $\text{Mn}_{0.75}\text{Ni}_{0.25}\text{CO}_3$  precursors and  $\text{Li}_2\text{CO}_3$  at the molar ratio of  $\text{Li}:\text{TM}=1.05$  (Li excess 5%). After calcining at  $850 \text{ }^\circ\text{C}$  for 12 h, the samples were cooled to  $500 \text{ }^\circ\text{C}$  and then sintered at  $500 \text{ }^\circ\text{C}$  for 5 hours in air atmosphere. LLO@Ce samples were prepared by homogeneously mixing  $\text{Mn}_{0.75}\text{Ni}_{0.25}\text{CO}_3$  precursors,  $\text{Li}_2\text{CO}_3$  and  $\text{CeO}_2$  in the molar ratio of  $\text{Li}:\text{TM}:\text{Ce}=1.05:1:0.005$ , and then sintering according to the above process. For the synthesis of LLO@Ce-LCO, the LLO@Ce and  $\text{Ce}(\text{NO}_3)_3\cdot 6\text{H}_2\text{O}$  were mixed in ethanol solution with the molar ratio of  $\text{TM}:\text{Ce}=1:0.005$ , the desired powder materials were obtained by evaporation by stirring at  $80 \text{ }^\circ\text{C}$  and then calcining at  $600 \text{ }^\circ\text{C}$  for 10 h in air atmosphere. The synthesis process is shown in Fig. 1a.

##### 1.2 Characterization methods.

X-ray diffraction (XRD) was used to detect the details of the crystal phase. The data was collected in a scan speed of  $3^\circ \text{ min}^{-1}$  with  $\text{Cu K}\alpha$  radiation. Refine treatment was performed by Full Prof Suite software. X-ray photoelectron spectroscopy (XPS)

spectrum was obtained by a spectrometer of Kratos Analytical Ltd. with Al K $\alpha$  radiation. The spectrum data was fitted with XPS Peak-Fit software. Scanning electron microscopy (SEM) and transmission electron microscopy (TEM) were used to evaluate the morphology or microstructure of the materials. Energy dispersive X-ray spectroscopy (EDS) mapping images were obtained by SEM. The fast Fourier transform (FFT) images were obtained via Digital-Micrograph software.

### 1.3 Electrochemical Measurements.

To investigate the electrochemical performance of the materials, the cell in a coin configuration (CR2016) was assembled with the cathode, separator, lithium plate, and electrolyte under an Ar atmosphere. The electrode was prepared by casting the slurry composing cathode material, carbon black, and binder (80:10:10 by weight) on the Al foil. The loading mass of the active material was fixed at  $1.0 \pm 0.1$  mg to ensure the veracity of measurement results. Li metal was the counter and reference electrode. Celgard 2400 was used as separator. The electrolyte was 1M LiPF<sub>6</sub> in ethylene carbonate/dimethyl carbonate, (1:1 by volume). The as-prepared cells were subjected to electrochemical measurements via Neware software. The cyclic voltammetry (CV) tests were carried out between 2.0 and 4.8 V. A galvanostatic intermittent titration technique (GITT) was conducted to evaluate the kinetic properties of electrodes. AC impedance spectrum (0.01-10<sup>5</sup> Hz) were measured using a multichannel potentiostat galvanostat from Princeton Applied Research.

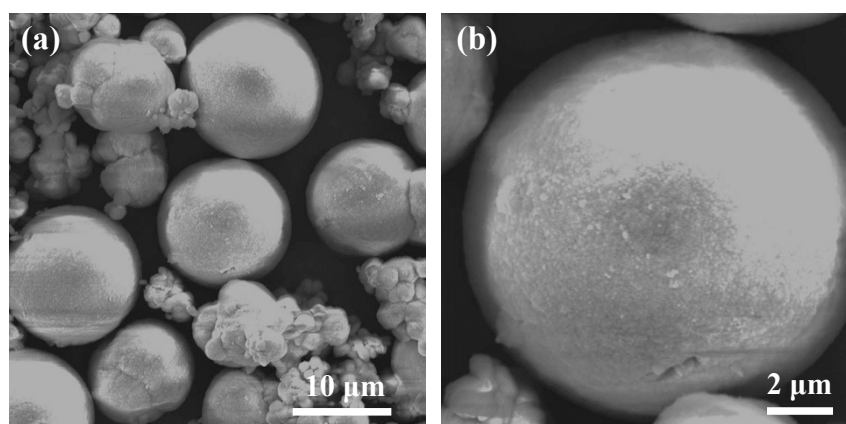

Fig. S1 The carbonate precursor in different magnifications

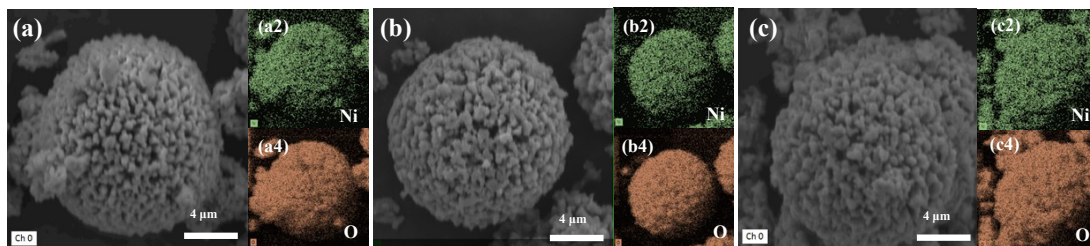

Fig. S2. (a-c) Elemental mapping of three samples

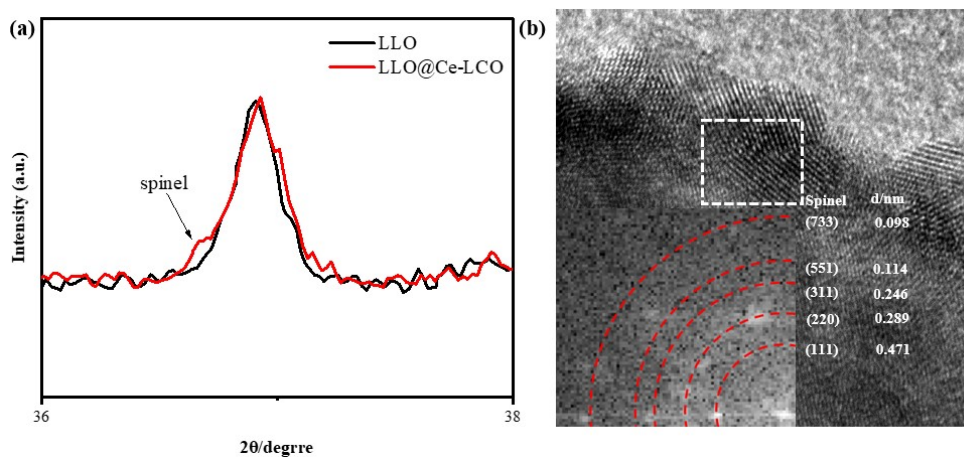

Fig. S3. (a) The XRD comparison of two samples and (b) the fast Fourier transform (FFT) of spinel structure.

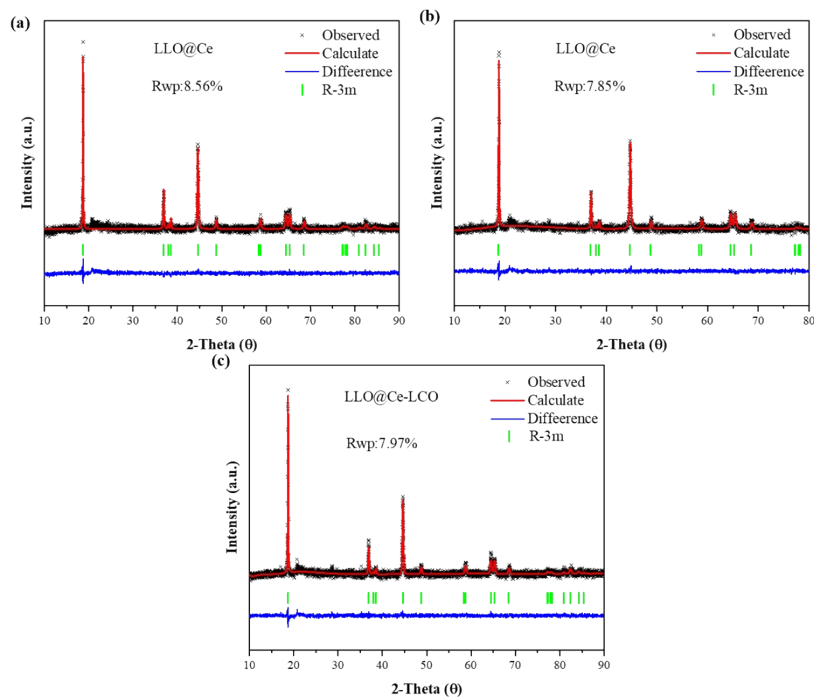

Fig. S4. Rietveld refinement images of a) LLO, b) LLO@Ce, c) LLO@Ce-LCO

Table S1. The refined crystallographic parameters of the as prepared samples.

| material   | a=b (Å)  | c (Å)    | alpha | beta | gamma | volume(Å <sup>3</sup> ) |
|------------|----------|----------|-------|------|-------|-------------------------|
| LLO        | 2.855349 | 14.23645 | 90    | 90   | 120   | 100.52                  |
| LLO@Ce     | 2.854878 | 14.23972 | 90    | 90   | 120   | 100.51                  |
| LLO@Ce-LCO | 2.860844 | 14.25423 | 90    | 90   | 120   | 101.033                 |

Table S2. The refined crystallographic parameters of the as prepared samples.

| label             | x | y | z      | frac  |
|-------------------|---|---|--------|-------|
| <b>LLO</b>        |   |   |        |       |
| Li1               | 0 | 0 | 0      | 0.975 |
| Co1               | 0 | 0 | 0.5    | 0.333 |
| Ni2               | 0 | 0 | 0      | 0.025 |
| Mn1               | 0 | 0 | 0.5    | 0.333 |
| Ni1               | 0 | 0 | 0.5    | 0.309 |
| Li2               | 0 | 0 | 0.5    | 0.025 |
| O1                | 0 | 0 | 0.2411 | 1     |
| <b>LLO@Ce</b>     |   |   |        |       |
| Li1               | 0 | 0 | 0      | 0.975 |
| Co1               | 0 | 0 | 0.5    | 0.332 |
| Ni2               | 0 | 0 | 0      | 0.025 |
| Mn1               | 0 | 0 | 0.5    | 0.330 |
| Ni1               | 0 | 0 | 0.5    | 0.308 |
| Li2               | 0 | 0 | 0.5    | 0.025 |
| O1                | 0 | 0 | 0.2411 | 1     |
| Ce8               | 0 | 0 | 0.5    | 0.005 |
| <b>LLO@Ce-LCO</b> |   |   |        |       |
| Li1               | 0 | 0 | 0      | 0.975 |
| Co1               | 0 | 0 | 0.5    | 0.332 |
| Ni2               | 0 | 0 | 0      | 0.025 |
| Mn1               | 0 | 0 | 0.5    | 0.328 |
| Ni1               | 0 | 0 | 0.5    | 0.305 |
| Li2               | 0 | 0 | 0.5    | 0.025 |
| O1                | 0 | 0 | 0.2411 | 1     |
| Ce8               | 0 | 0 | 0.5    | 0.005 |
| Ce9               | 0 | 0 | 0.5    | 0.005 |

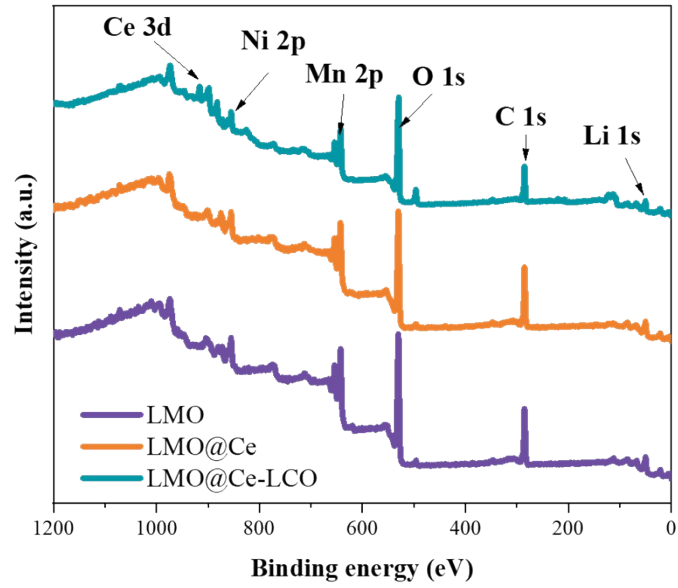

Fig. S5. XPS patterns of the LLO, LLO@Ce and LLO@Ce-LCO samples.

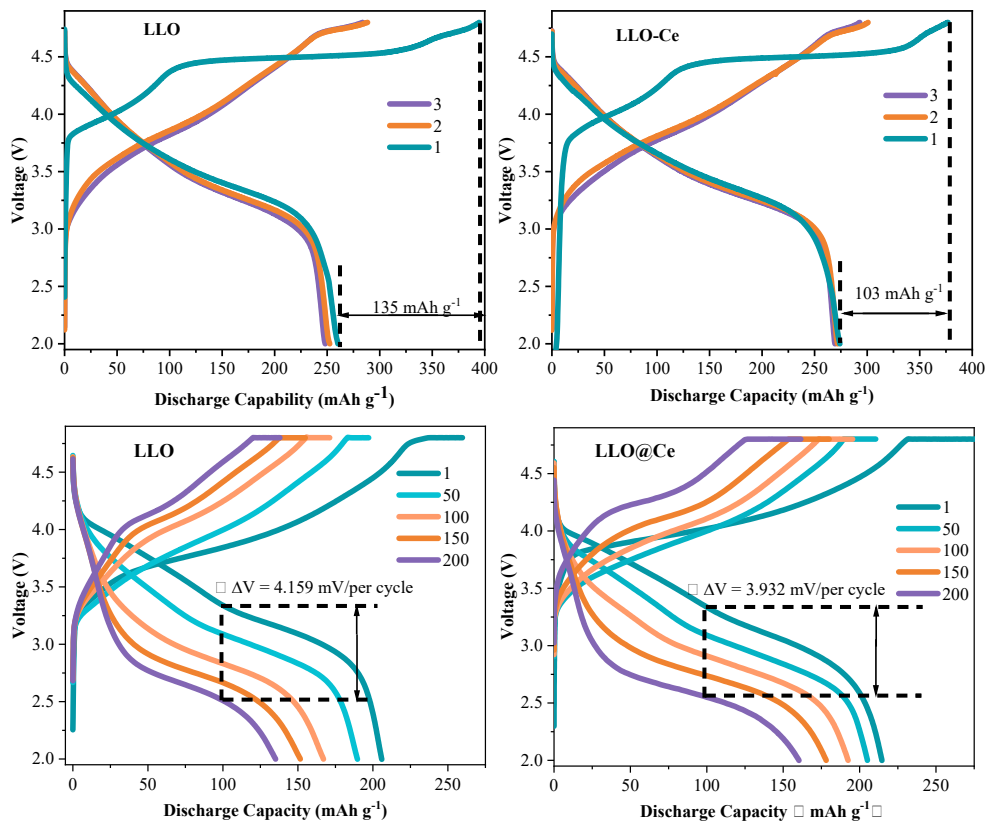

Fig. S6. a-b) Initial charging/discharging profiles of the samples at 0.1 C. c-d) The selected differential capacity versus voltage curves of the samples at 1 C.

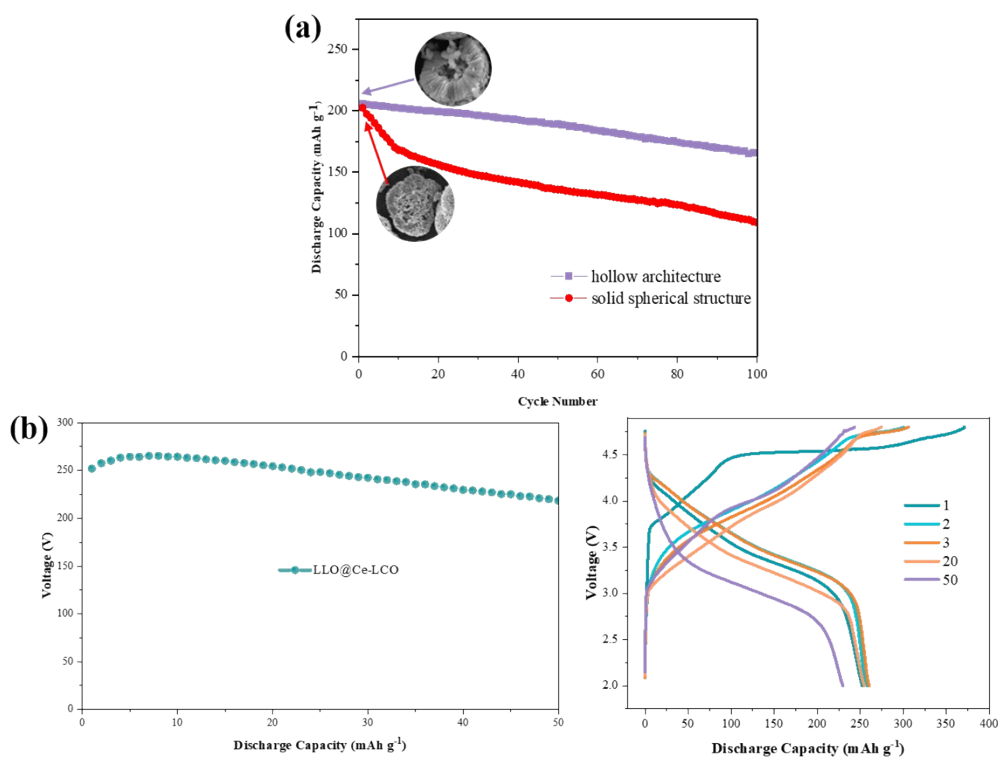

Fig. S7. (a) The comparison of electrical properties of Li-rich materials with hollow and solid structures, (b) Cyclic performance and (c) charge-discharge curves of LLO@Ce-LCO at 0.2C

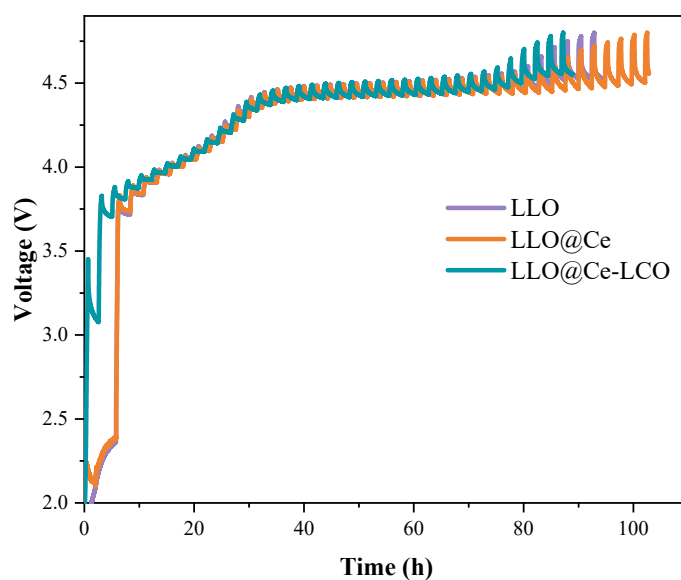

Fig. S8. GITT curve of three samples.

Li-ion diffusivity ( $D_{Li^+}$ ) is identified by GITT.  $D_{Li^+}$  was analyzed by the

following simplified equation according to Fick's second law.

$$D_{Li^+} = \frac{4}{\pi\tau} \left( \frac{m_B V_m}{M_B S} \right)^2 \left( \frac{\Delta E_s}{\Delta E_t} \right)^2$$

Where  $\tau$  is current pulse duration,  $m_B$  and  $M_B$  are the active mass and molar mass,  $V_m$  is the molar volume; and  $S$  is interface area between electrode and electrolyte,  $\Delta E_s$  is voltage change between the open circuit voltage measured at the end of two consecutive measurements,  $\Delta E_t$  is total voltage change during charging or discharging.

$D_{Li^+}$  calculation of LLO, LLO@Ce and LLO@Ce-LCO electrodes is shown in Fig. 4(j-l). By comparison, it is found that the  $Li^+$  diffusion coefficient of LLO material is the lowest, around  $10^{-11} \text{ cm}^2 \text{ s}^{-1}$ . The  $Li^+$  diffusion coefficient of LLO@Ce sample is improved to some extent, but still lower than  $10^{-10} \text{ cm}^2 \text{ s}^{-1}$ . However, the  $Li^+$  diffusion coefficient of LLO@Ce-LCO is significantly higher than  $10^{-10} \text{ cm}^2 \text{ s}^{-1}$ . The reason for this effect may be that Ce ions are inserted into the lattice, it can expand the c-axis spacing, which is conducive to the inhibition of anionic oxygen precipitation and the acceleration of lithium ions transmission rate. While the external oxygen storage layer is constructed, the subsurface spinel structure constructs the three-dimensional conductive network of lithium ions, which accelerates the transmission of lithium ion.

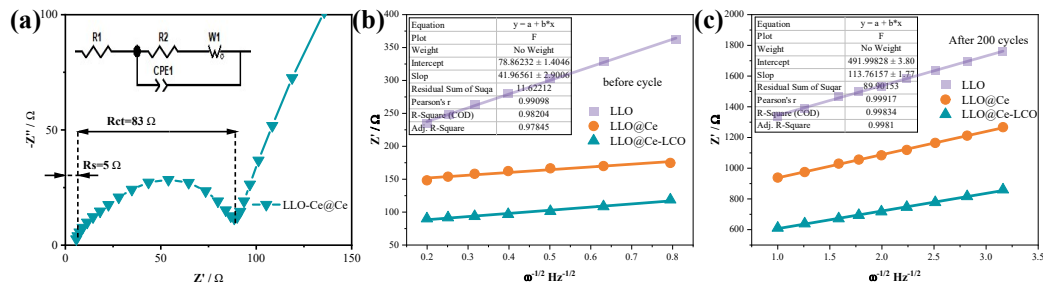

Fig. S9. (a) Impedance of LLO@Ce-LCO sample before cycling. (b, c) Warburg diffusion coefficients of three samples and the slop of LLO@Ce-LCO sample.

The  $D_{Li^+}$  were calculated by the following equation:

$$D_{Li^+} = \frac{R^2 T^2}{2A^2 n^4 F^4 C^2 \sigma^2}$$

(1)

$$Z' = R_{\Omega} + R_{ct} + \sigma \cdot \omega^{-0.5} \quad (2)$$

Where  $R$  represents the Gas constant;  $T$  is the thermodynamic temperature;  $A$  stands for the superficial area of the electrode;  $n$  is the quantity of the electrons in the electronic transfer process;  $F$  represents the Faraday's constant;  $C$  is the concentration of  $\text{Li}^+$  ions;  $\sigma$  is the Warburg factor which fitted in the Fig. S8, according to the equation (2).

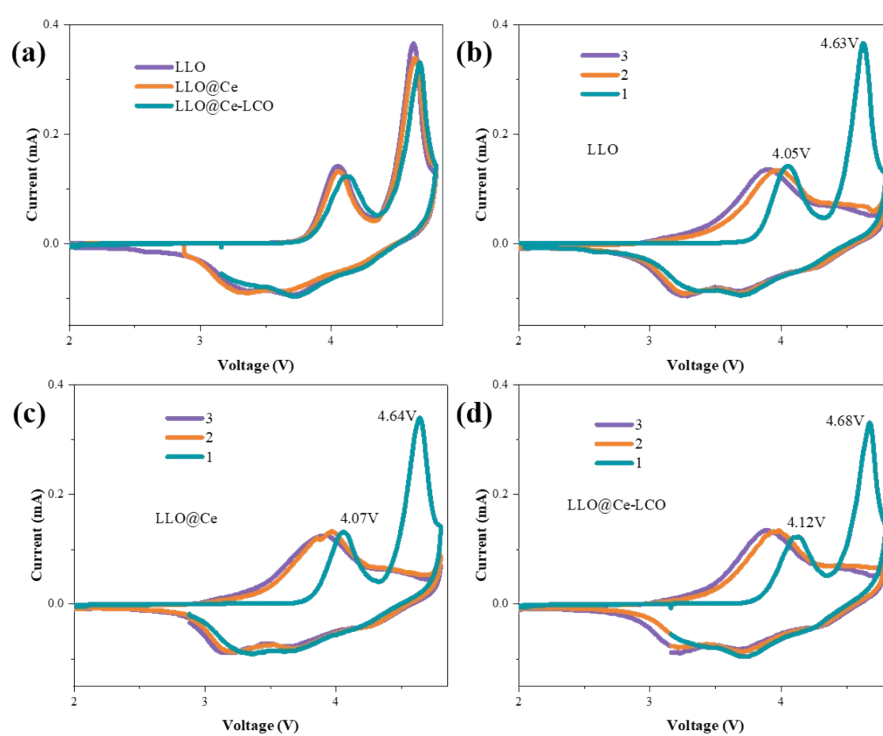

Fig. S10. a) Comparison of CV curves of the first cycle of the three samples. b-d) The CV curves of the first three cycles of the three samples, respectively.

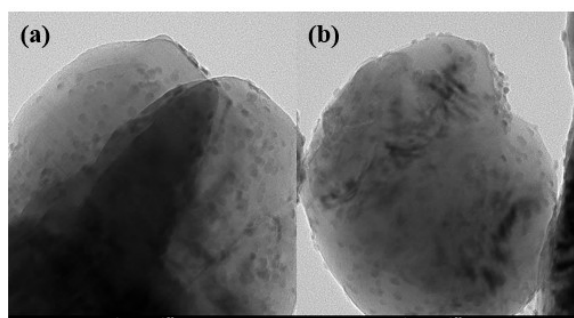



Fig. S11. (a) and (b) TEM images of LLO@Ce-LCO sample.

**Table S3. A brief summary of the electrochemical performance of LLO cathode in this work and those reported in literatures**

| Ref.      | Modification method                            | Initial discharge capacity (mAh g <sup>-1</sup> ) | Capacity retention                           |
|-----------|------------------------------------------------|---------------------------------------------------|----------------------------------------------|
| This work | Three in one design                            | 268 (0.1 C)                                       | 94% (1 C,100 cycles)<br>86% (1 C,200 cycles) |
| [10]      | Ce surface coating                             | 265 (0.1 C)                                       | 81% (1 C,200 cycles)                         |
| [12]      | La surface coating and doping                  | 280 (0.1 C)                                       | 92.8% (1 C,100 cycles)                       |
| [13]      | LiF gradient doping                            | 267 (0.1 C)                                       | 82% (0.5 C,20 cycles)                        |
| [17]      | Co <sub>x</sub> O <sub>y</sub> surface coating | 260 (0.1 C)                                       | 82% (0.5 C,200 cycles)                       |
| [25]      | Hollowspheres design                           | 267 (0.1 C)                                       | 80.0% (1 C,100 cycles)                       |
| [26]      | Hollowspheres design                           | 261 (0.12 C)                                      | 74% (1 C,100 cycles)                         |
| [28]      | Na doping                                      | 276 (0.1 C)                                       | 80.% (1 C,200 cycles)                        |

Table S4. The simulation values of R<sub>S</sub>, R<sub>ct</sub> and D<sup>Li+</sup> for the LLO, LLO@Ce and LLO@Ce-LCO

| samples    | R <sub>1</sub> (Ω) | R <sub>2</sub> (Ω) | D <sup>Li+</sup> (cm <sup>2</sup> s <sup>-1</sup> ) |
|------------|--------------------|--------------------|-----------------------------------------------------|
| LLO        | 1.57               | 152.7              | 2.98×10 <sup>-12</sup>                              |
| LLO@Ce     | 1.46               | 166.9              | 6.49×10 <sup>-12</sup>                              |
| LLO@Ce-LCO | 1.28               | 99.4               | 2.12×10 <sup>-11</sup>                              |
